# 1 Different preference functions act in unison: mate 2 choice and risk-taking behaviour in the Atlantic 3 molly (*Poecilia mexicana*) 4

5 Carolin Sommer-Trembo<sup>1</sup>, Michael Schreier<sup>2</sup> & Martin Plath<sup>3</sup>  
6

7 <sup>1</sup> Department of Environmental Sciences, Institute of Zoology, University of Basel, Switzerland

8 <sup>2</sup> Department of Ecology and Evolution, J.W. Goethe University Frankfurt, Max-von-Laue-Straße 13, 60438,  
9 Frankfurt am Main, Germany

10 <sup>3</sup> College of Animal Science and Technology, Northwest A&F University, Yangling 712100, P.R. China

11 \* Corresponding author's email: [sommer-trembo@gmx.de](mailto:sommer-trembo@gmx.de)  
12

## 13 Abstract

14 Consistent individual differences in behaviour (animal personality) are widespread throughout  
15 the Animal Kingdom. This includes variation in risk-taking versus risk-averse behavioural  
16 tendencies. Variation in several personality dimensions is associated with distinct fitness  
17 consequences and thus, may become a target of natural and/or sexual selection. However, the  
18 link between animal personality and mate choice—as a major component of sexual  
19 selection—remains understudied. We asked (1) whether females and males of the livebearing  
20 fish *Poecilia mexicana* prefer risk-taking mating partners (directional mating preference), (2)  
21 or if their preferences are dependent on the choosing individual's own personality type  
22 (assortative mating). We characterized each test subject for its risk-taking behaviour, assessed  
23 as the time to emerge from shelter and enter an unknown area. In dichotomous association  
24 preference tests, we offered two potential mating partners that differed in risk-taking  
25 behaviour but were matched for other phenotypic traits (body size, shape, and colouration).  
26 Females, but not males, exhibited a strong directional preference for risk-taking over risk-  
27 averse mating partners. At the same time, the strength of females' preferences correlated  
28 positively with their own risk-taking scores. Our study is the first to demonstrate that a strong  
29 overall preference for risk-taking mating partners does not preclude effects of choosing  
30 individuals' own personality type on (subtle) individual variation in mating preferences. More  
31 generally, two different preferences functions appear to interact to determine the outcome of  
32 individual mate choice decisions.  
33

34 **Keywords:** Animal personality, sexual selection, female choice, male mate choice, boldness

35

## 36 Introduction

37 Behavioural differences among individuals that are consistent over time and across contexts  
38 (animal personality or temperament) can be found throughout the Animal Kingdom (Gosling,  
39 2001; Kralj-Fišer & Schuett, 2014; Weiss, 2018). Additive genetic effects contribute to  
40 variation in animal personality traits (Dochtermann, Schwab & Sih, 2015), and heritability  
41 estimates are often comparable to those reported for life-history and physiological traits  
42 (Dochtermann, Schwab, Anderson Berdal, Dalos & Royauté, 2019). This renders animal  
43 personality a potential target of both natural and sexual selection (Dingemanse & Réale, 2005;  
44 Schuett, Tregenza & Dall, 2010). Accordingly, several empirical studies demonstrated fitness  
45 consequences for different personality dimensions, such as boldness (risk-taking behaviour),  
46 exploration and sociability (Ballew, Mittelbach & Scribner, 2017; Cote, Dreiss & Clobert,  
47 2008; Dingemanse, Both, Drent & Tinbergen, 2004).

48 A meta-analysis across taxonomic groups suggested that individual variation along the  
49 continuum between risk-taking and risk-averse behaviour—the most studied animal  
50 personality dimension—tends to be associated with an increased reproductive success of risk-  
51 taking individuals, particularly males (Smith & Blumstein, 2008). It remains controversial,  
52 however, what mechanisms might explain fitness variation among behavioural types and  
53 whether sexual selection (e.g. female choice in favour of risk-taking mating partners) plays a  
54 role in this context (Schuett, Tregenza & Dall, 2010; Smith & Blumstein, 2008). Female  
55 guppies (*Poecilia reticulata*), for example, preferred risk-taking over risk-averse males when  
56 risk-taking tendencies were experimentally manipulated by presenting single males close to  
57 (or away from) predators (Godin & Dugatkin, 1996). The question remains as to whether  
58 females would be able to assess actual male personality types independent of males'  
59 behavioural responses to predators. Females could base their mate choice on correlated

60 phenotypic traits, as risk-taking behavioural tendencies (and other personality traits) can be  
61 associated with variation in traits like body colouration, or size (Brown, Jones & Braithwaite,  
62 2007; Schweitzer, Montreuil & Dechaume-Moncharmont, 2015). However, even if those  
63 phenotypic traits are carefully matched between experimentally presented potential mating  
64 partners—as we did in our present study (see below)—systematic co-variation between risk-  
65 taking behavioural tendencies and other behaviours could be used for mate assessment. This  
66 includes differences in swimming patterns (Kern, Robinson, Gass, Godwin & Langerhans,  
67 2016; Wilson & Godin, 2009), body posture, or readiness to resume normal swimming  
68 behaviour after disturbance (Brown, Jones & Braithwaite, 2005; Sommer-Trembo & Plath,  
69 2018; this study).

70 While some studies suggest the existence of a directional preference for risk-taking  
71 mating partners, others reported contrasting patterns in that risk-taking females preferred risk-  
72 taking males and *vice versa*, leading to assortative mating (Jiang, Bolnick & Kirkpatrick,  
73 2013). Assortative mating can affect individuals' reproductive success (Both, Dingemane,  
74 Drent & Tinbergen, 2005; Kralj-Fišer, Sanguino Mostajo, Preik, Pekár & Schneider, 2013;  
75 Scherer, Kuhnhardt & Schuett, 2017). For instance, guppy females that were paired with  
76 males showing similar risk-taking tendencies had a higher parturition success than females  
77 that were paired disassortatively (Ariyomo & Watt, 2013).

78 Here, we present a test for directional mate choice and/or assortative mating based on  
79 individuals' risk-taking behaviour in the livebearing fish *Poecilia mexicana*. For the first time,  
80 we assessed both male and female mating preferences. While the importance of male mate  
81 choice is increasingly acknowledged (Edward & Chapman, 2011), studies on male mate  
82 choice for female personality types are virtually absent. We used emergence tests (Brown,  
83 Jones & Braithwaite, 2005; Sommer-Trembo & Plath, 2018) to assess individuals' risk-taking  
84 behaviour. *Poecilia mexicana* (including the population studied here) has repeatedly been  
85 characterized for risk-taking behaviour, and previous studies reported high behavioural

86 repeatability, with R-values ranging between 0.53 and 0.64 (*freezing time after a simulated*  
87 *predator attack*,  $R = 0.64$ , [Sommer-Trembo et al., 2016a](#); repeatability across *time to emerge*  
88 *from shelter* and *freezing time after a simulated predator attack*,  $R = 0.53$ , [Sommer-Trembo](#)  
89 [& Plath, 2018](#)). Slightly lower, yet significant R-values were reported for the related guppy  
90 (*time to emerge from shelter*,  $R = 0.51$ , [Brown & Irving, 2013](#); *time to emerge from shelter*,  $R$   
91  $= 0.51$  for females and  $R = 0.36$  for males, [Irving & Brown, 2013](#); *time to emerge from*  
92 *shelter*,  $R = 0.33$ , [White, Kells & Wilson, 2016](#)) and other poeciliid fishes (e.g., *Gambusia*  
93 *affinis*, *time to emerge from shelter*,  $R = 0.29$  in [Cote, Fogarty, Weinersmith, Brodin & Sih,](#)  
94 [2010](#) and  $R = 0.39$  in [Gomes-Silva, Liu, Chen, Plath & Sommer-Trembo, 2017](#); *Poecilia*  
95 *vivipara*, *time to emerge from shelter*,  $R = 0.70$ , [Sommer-Trembo et al. 2016b](#)). For our  
96 present study, we initially screened a large number of potential stimulus and focal individuals  
97 so as to be able to select stimulus pairs with contrasting behavioural type (see methods). This  
98 time-consuming approach led us to decide to not assess behavioural repeatability, but we  
99 argue that behavioural repeatability of risk-taking tendencies is well established in our study  
100 species.

101 We performed dichotomous mate choice tests in which focal individuals could choose  
102 between two stimulus individuals of the opposite sex that differed in risk-taking tendencies  
103 but were matched for other phenotypic traits known to be involved in mate assessment (body  
104 size, shape and colouration; [Rios-Cardenas & Morris, 2011](#)). This left only behavioural  
105 characteristics correlated with risk-taking tendencies as a potential source for mate  
106 assessment. We asked whether focal individuals prefer risk-taking over risk-averse mating  
107 partners (directional preference) and/or whether a pattern indicative of assortative mating  
108 would be uncovered. Either result would indicate that focal individuals were able to assess the  
109 behavioural type of potential mating partners within the short time period of our mate choice  
110 tests (focal and stimulus individuals were unfamiliar prior to the tests) and without an  
111 opportunity to observe interactions with predators.

112           While predictions may seem to be mutually exclusive when considering the potential  
113 occurrence of directional mating preferences or assortative mating, we argue that this is  
114 actually not the case: focal individuals [at least females (Godin & Dugatkin, 1996)] could  
115 show an overall (directional) preference for risk-taking mating partners. Still, ‘hidden’ within  
116 the individual variation in mating preferences, focal individuals’ own risk-taking tendencies  
117 might predict the strength at which individuals express this mating preference. Our present  
118 study confirms that both preference functions indeed act in unison and jointly explain female  
119 (but not male) mate choice for risk-taking mating partners.

120

## 121 **Materials and methods**

### 122 **Test subjects and general testing procedure**

123 Test subjects were laboratory-reared descendants of wild-caught Atlantic mollies (*Poecilia*  
124 *mexicana*), which we collected in the southern Mexican Río Oxolotán in 2013. We  
125 maintained the fish in several aerated and filtered 200-L stock tanks at 28°C under a 12/12 h  
126 light/dark cycle. Our stock tanks comprised juveniles and adults of both sexes at densities of  
127 50–70 adult individuals per tank. We fed the fish twice a day *ad libitum*-amounts of  
128 commercially available flake food (Tetra Min<sup>®</sup>), frozen spinach, *Artemia* naupliae and frozen  
129 bloodworms (*Chironomus* larvae). Aquaria were equipped with live and artificial plants and  
130 stones. To maintain water quality, we replaced half of the water by aged tap water every 2  
131 weeks. Focal and stimulus fish for the mate choice tests were taken from different stock tanks  
132 and were thus unfamiliar prior to the tests.

133           We conducted our behavioural experiments in 2016. Before the behavioural  
134 assessments, test subjects were held for three days in same-sex groups at densities of 20  
135 individuals per tank. We initially tested a large number of fish ( $n = 300$ ) for risk-taking  
136 tendencies, after which they were given three days for recovery before focal individuals and

137 stimulus pairs were selected. We tested a sub-set of  $n = 54$  focal individuals (27 females and  
138 27 males) for their mating preferences by using dichotomous mate choice tests (see below for  
139 details on which individuals were selected for the mate choice tests).

140

### 141 **Assessment of risk-taking tendencies**

142 We used time to emerge from shelter and enter an unknown area as a proxy of individuals'  
143 risk-taking tendency (Brown, Jones & Braithwaite, 2005; Sommer-Trembo & Plath, 2018).  
144 To this end, the test subject was gently transferred into the shelter compartment of the test  
145 tank, which was equipped with stones and artificial plants (see Sommer-Trembo & Plath,  
146 2018 for details). After a 3-min acclimatization period (after which all tested individuals  
147 showed normal swimming behaviour), we lifted an opaque Plexiglas divider and measured  
148 the time until the fish entered the open field area with a uniformly grey bottom and no  
149 opportunities for hiding. Based on a pilot study, fish were given a maximum of 60 s to emerge  
150 from shelter. We calculated individual risk-taking scores as: [maximum emergence time (60  
151 s) – individual emergence time], which resulted in high scores for risk-taking and low scores  
152 for risk-averse individuals. 85% of test subject emerged from shelter within 60 s, whereas the  
153 other 15% reached the ceiling value of 60 s.

154

### 155 **Assignment of focal and stimulus individuals**

156 Initially, we assessed risk-taking tendencies of  $n = 150$  females and  $n = 150$  males. We  
157 randomly selected 60 of those individuals ( $n = 30$  per sex), based on the flip of a coin, which  
158 did not undergo any further behavioural test before they served as focal individuals (see  
159 below). Of the remaining 240 individuals, we disregarded individuals with intermediate  
160 boldness-scores (emergence times between 21 and 39 s) and retained those individuals as  
161 potential stimulus fish that could be characterized unambiguously as either risk-taking  
162 (emergence times  $\leq 20$  s) or risk-averse ( $\geq 40$  s).

163 We measured the standard length (SL) of all individuals meeting these criteria to the  
164 nearest millimetre by laying the fish flat on moist laminated millimetre paper and matched  
165 stimulus pairs according to their SL (difference  $\leq 3$  mm). Body size is known to be an  
166 important criterion of mate choice in poeciliids (Bisazza, Marconato & Marin, 1989;  
167 Herdman, Kelley & Godin, 2004; Plath, Seggel, Burmeister, Heubel & Schlupp, 2006).  
168 Additionally, we visually matched the respective stimulus pairs with respect to body shape  
169 and colouration (Fig. 1). However, we refrained from analyses such as spectroradiometric  
170 assessments of body coloration (e.g., Dugatkin & Godin, 1996; Jordan et al., 2004) so as to  
171 avoid stressful anaesthesia or other forms of handling before the mate choice tests. Following  
172 this procedure, we successfully assigned 54 stimulus pairs ( $n = 27$  per sex).

173 Of the 60 fish that were initially selected to serve as potential focal individuals, we  
174 randomly selected  $n = 27$  individuals per sex as focal individuals for our mate choice tests and  
175 tested each focal individual with a different stimulus pair. To keep stress levels before the  
176 mate choice test as low as possible, SL of the focal fish was measured only after the mate  
177 choice tests. Upon completion of the behavioural tests, all fish were retransferred into their  
178 original stock tanks.



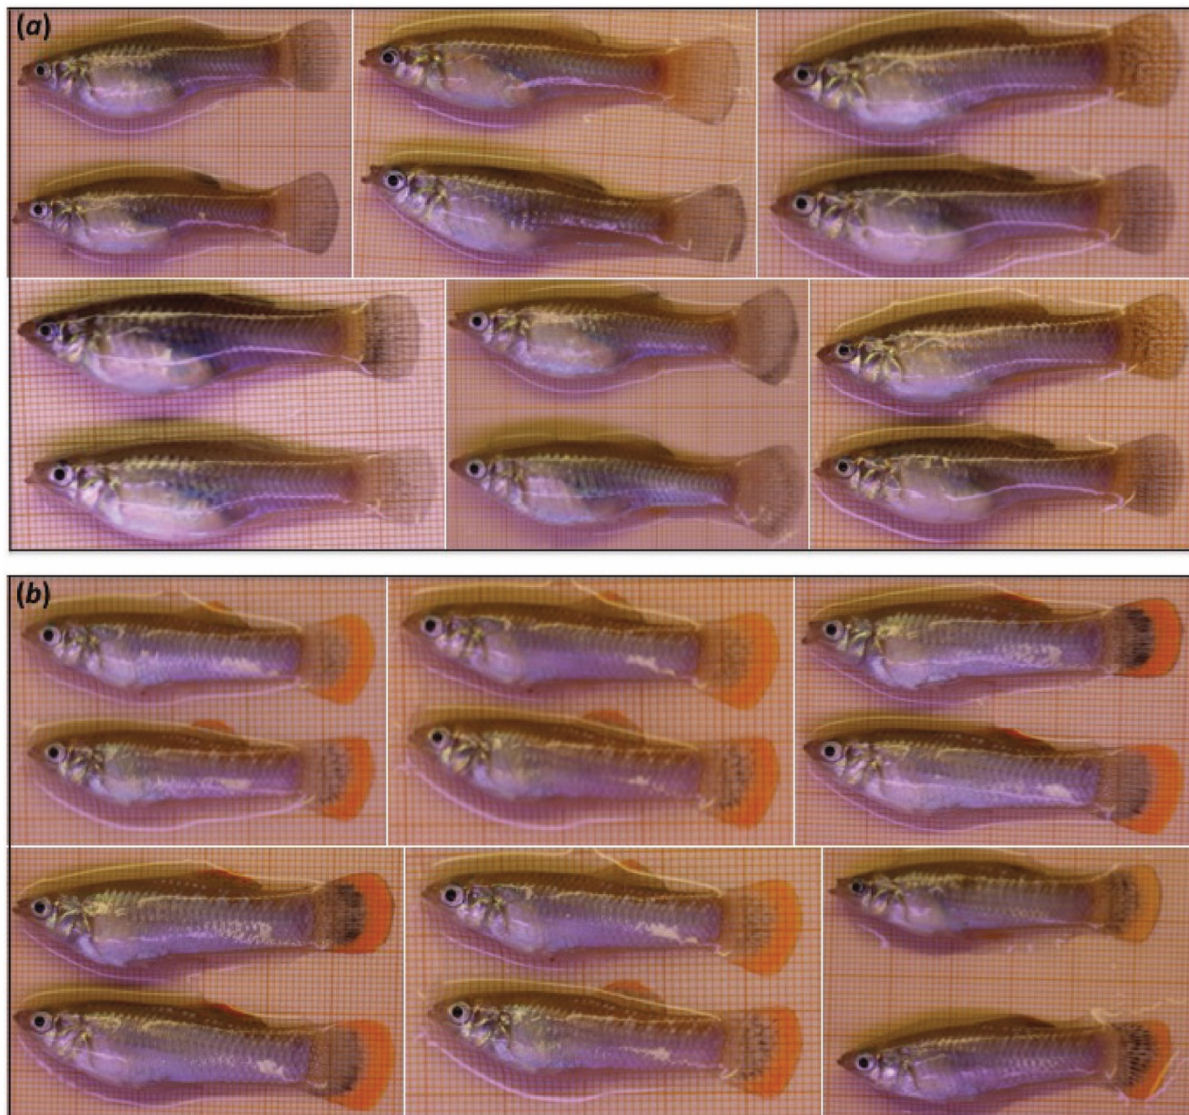

179 **Figure 1**  
180 Examples of stimulus pairs (*a* females; *b* males), matched for standard length, body shape and  
181 colouration.  
182

### 183 **Mate choice tests**

184 During the association preference tests, a focal individual could choose between a risk-taking  
185 and a risk-averse mating partner. The test tank ( $60 \times 25 \times 35$  cm) was divided into a central  
186 neutral zone (30 cm) and two lateral preference zones (15 cm each) adjacent to the stimulus  
187 compartments, which were separated from the main tank by transparent Plexiglas sheets (see  
188 [Sommer-Trembo et al., 2016](#) for details). The focal fish was allowed to move freely between  
189 zones during a 5-min observation period, during which we scored times spent in either of the  
190 preference zones. We then switched side assignments of both stimulus individuals to avoid



191 potential side biases and repeated measurement of association times. We summed times spent  
192 in association with either stimulus individual during the entire 10-min testing period.

193 We calculated strength of preference (SOP)-scores for risk-taking mating partners as:  
194 (time spent with risk-taking stimulus – time spent with risk-averse stimulus) / total association  
195 time. Thus, an SOP-score of +1 reflects maximal preference for the risk-taking stimulus and -  
196 1 maximal preference for the risk-averse stimulus fish.

197

## 198 **Statistical analyses**

199 All statistical tests were conducted using SPSS version 24.0. Where parametric tests were  
200 used, dependent variables met the assumptions of normal error distribution and  
201 homoscedasticity. Analyses were conducted separately for males and females.

202 To test for a directional preference for risk-taking mating partners, we used paired *t*-  
203 tests and compared association times near both types of stimulus individuals. We compared  
204 risk-taking scores and SOP-values between sexes using non-parametric Mann-Whitney *U*-  
205 tests. To test for potential effects of choosing individuals' own personality (assortative mate  
206 choice), we ran univariate General Linear Models (GLM) using SOP-scores as the dependent  
207 variable and focal individuals' risk-taking behaviour as a covariate. Due to limited sample  
208 sizes, we could not include all potentially biologically meaningful additional explanatory  
209 variables (size difference of risk-taking stimulus – risk-averse stimulus; focal individuals'  
210 SL). However, when those covariates were included alongside focal individuals' risk-taking  
211 behaviour in alternative GLMs, neither their main effects ( $F_{1,24} < 0.54$ ,  $P > 0.47$ ) nor  
212 interactions with risk-taking scores ( $F_{1,23} < 0.70$ ,  $P > 0.41$ ) were significant. Hence, in our  
213 main GLMs, the mean SL of the stimulus individuals and focal individuals' risk-taking scores  
214 served as covariates. We excluded the non-significant interaction terms (females:  $F_{1,23} = 0.58$ ,  
215  $P = 0.46$ ; males:  $F_{1,23} = 2.19$ ,  $P = 0.15$ ).

216

## 217 Results

218 Males tended to be more risk-taking than females (Mean  $\pm$  S.E. risk-taking-scores, females:  
219  $31.2 \pm 4.6$  s; males:  $42.5 \pm 3.4$  s), but the difference was not statistically significant (Mann-  
220 Whitney  $U$ -test:  $z = 1.60$ ,  $p = 0.11$ ). Focal females showed a directional preference for risk-  
221 taking males and spent  $263.4 \pm 20.9$  s in association with the risk-taking and  $151.7 \pm 16.9$  s  
222 near the risk-averse stimulus male (paired  $t$ -test:  $t_{26} = 3.31$ ,  $p = 0.003$ ; Fig. 2a). By contrast,  
223 focal males did not show a directional preference related to females' propensity to take risks  
224 (time spent with risk-taking female:  $266.8 \pm 23.0$  s; with risk-averse female:  $220.9 \pm 22.8$  s;  
225 paired  $t$ -test:  $t_{26} = 1.04$ ,  $p = 0.31$ ; Fig. 2b). However, strength of preference (SOP)-scores did  
226 not differ significantly between sexes (Mann-Whitney  $U$ -test:  $z = 1.54$ ,  $p = 0.12$ ).

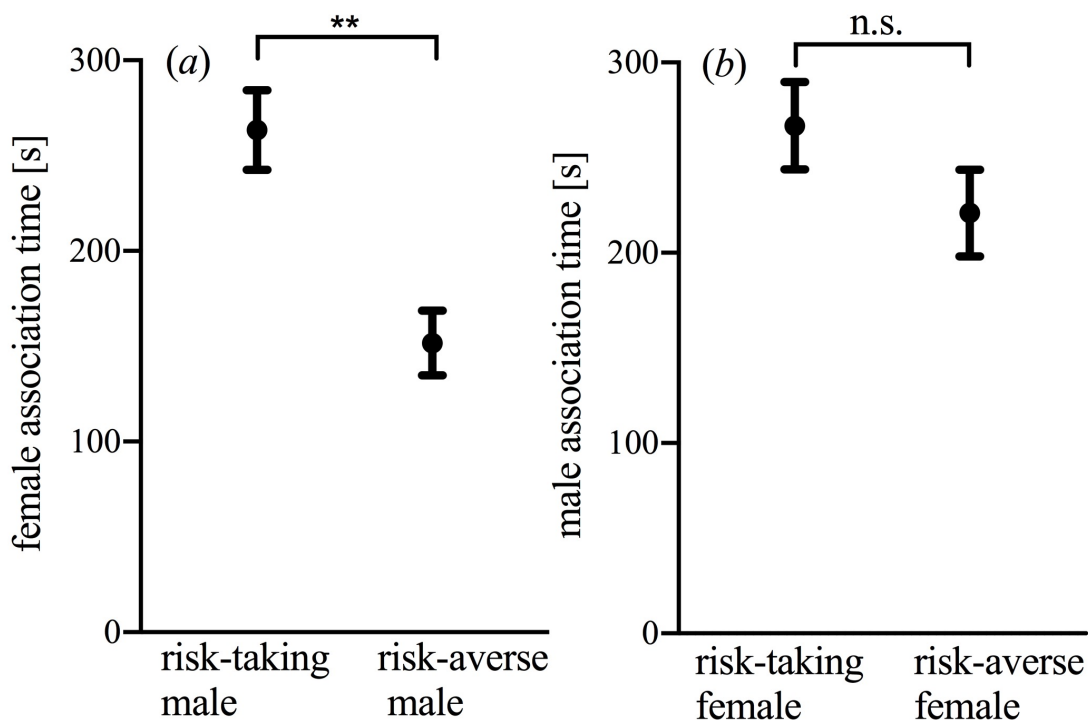

227

### 228 Figure 2

229 Results of dichotomous preference tests to assess directional mating preferences for risk-  
230 taking mating partners. Shown are the mean ( $\pm$  S.E.) times focal individuals (*a* females, *b*  
231 males) spent associating with risk-taking and risk-averse stimulus individuals of the opposite  
232 sex.

233

234 Focal females' risk-taking tendency had a significant effect on their SOP (GLM,  $F_{1,24}$   
235 = 4.94,  $p = 0.036$ ; mean SL of stimulus males:  $F_{1,24} = 2.28$ ,  $p = 0.14$ ). A *post-hoc* Pearson  
236 correlation confirmed a significant, positive correlation between both variables (Fig. 3a).  
237 Neither focal males' risk-taking tendency ( $F_{1,24} = 0.56$ ,  $p = 0.46$ ; Fig. 3b) nor the stimulus  
238 females' mean body size (SL;  $F_{1,24} = 0.21$ ,  $p = 0.65$ ) had statistically significant effects on  
239 males' SOP.  
240

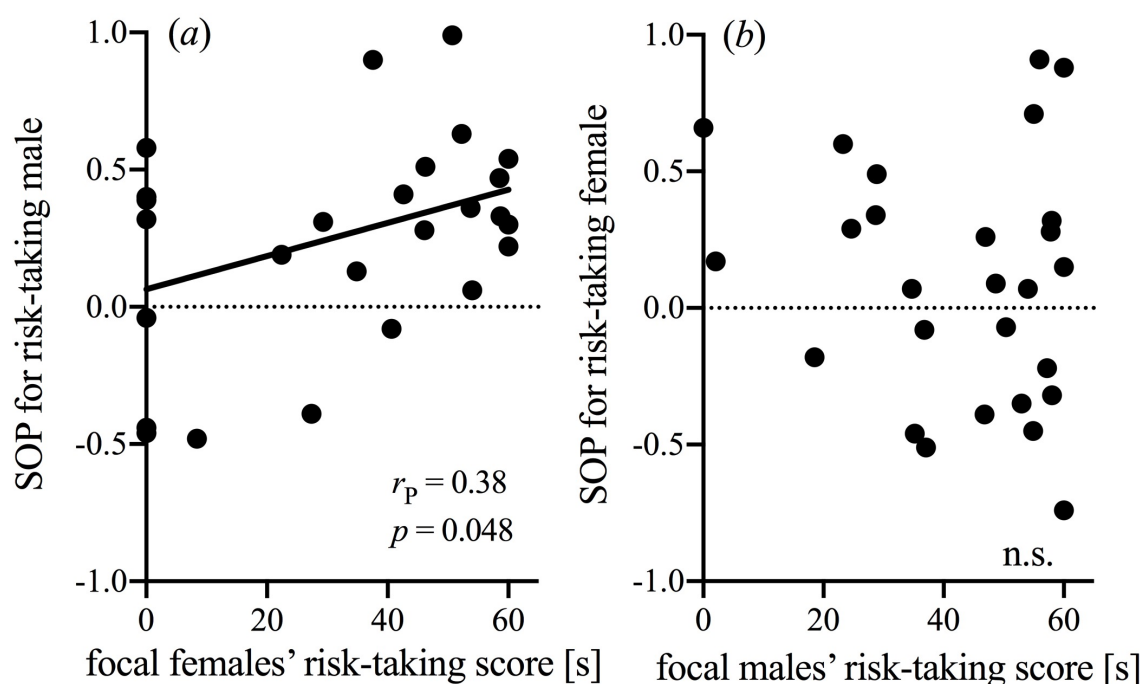

241

### 242 **Figure 3**

243 Scattergrams showing the correlation between focal individuals' own risk-taking scores and  
244 their strength of preference (SOP) for risk-taking mating partners (testing for assortative mate  
245 choice). Females (a) but not males (b) showed a pattern where the choosing individual's risk-  
246 taking tendency predicted variation in SOP-values, and risk-taking females showed stronger  
247 preferences for risk-taking stimulus males (*post-hoc* Pearson correlation).  
248

## 249 **Discussion**

250 Animal personality represents a major component of intraspecific phenotypic variation (Wolf  
251 & Weissing, 2012), but whether and how sexual selection (e.g., through mate choice) affects  
252 personality distributions remains understudied (Schuett, Tregenza & Dall, 2010). Using the

253 livebearing fish *Poecilia mexicana*, we investigated whether a directional mating preference  
254 for risk-taking mating partners provides those individuals with a reproductive advantage  
255 (Godin & Dugatkin, 1996; Kortet, Niemelä, Vainikka & Laakso, 2019) and/or if the strength  
256 of preference for risk-taking individuals would be dependent on the choosing individuals'  
257 own tendency to take risks (assortative mate choice; Scherer, Kuhnhardt & Schuett, 2017).  
258 We found a pattern in which both preference functions appear to interact: female (but not  
259 male) *P. mexicana* generally preferred risk-taking over risk-averse mating partners, but the  
260 strength of preference (SOP) for risk-taking males was dependent on the choosing females'  
261 own personality type (i.e. risk-taking females exhibited stronger preferences for risk-taking  
262 males than risk-averse females).

263         A multitude of studies on mate choice considered mean preferences across individuals  
264 and inferred the existence of directional preferences for certain phenotypic traits (e.g., Kodric-  
265 Brown, 1985; Maan & Cummings, 2009; Marler & Ryan, 1997). In those cases, it often  
266 remains difficult to explain how additive genetic variance of the traits under sexual selection  
267 is maintained in natural populations (Brooks & Endler, 2001; Hoekstra et al., 2001; Morris,  
268 Nicoletto & Hesselman, 2003; Gasparini, Serena & Pilastro, 2013). Our results suggest that  
269 effects of the choosing individuals' personality type could contribute to the maintenance of  
270 this variation, as they produce individual variation in mating preferences. Future studies in  
271 this and other species will need to consider the fact that the effects we describe here can easily  
272 be overlooked when research merely focusses on (more obvious) directional preferences,  
273 neglecting the potential drivers/correlates of individual variation in those preferences.

274         In our current study, personality differentially affected female and male mate choice.  
275 We argue that the adaptive significance of choosing risk-taking mating partners differs  
276 between sexes: in group-living animals, risk-taking is often associated with aggression and  
277 dominance (Colléter & Brown, 2011; Dahlbom, Lagman, Lundstedt-Enkel, Sundström &  
278 Winberg, 2011). Social dominance, in turn, can be a correlate of mating success in fish and

279 other animals, especially in males (Ellis 1995; Jacob, Evanno, Renai, Sermier & Wedekind,  
280 2009; Paull et al., 2010). In *P. mexicana*, dominant males monopolize and defend groups of  
281 females (Bierbach et al., 2014), and females receive less sexual harassment from those males  
282 (Plath, Parzefall & Schlupp, 2003). Choosing risk-taking mating partners, therefore, likely  
283 provides both direct and indirect (genetic) benefits to females. Moreover, females likely base  
284 their mate choice on certain phenotypic traits of males that are correlated with/indicative of  
285 risk-taking (including behaviour, see below), and the strength of this correlation could simply  
286 be weaker or absent in females.

287         Why did risk-taking females show a stronger preference for risk-taking males than  
288 risk-averse ones? One possible explanation would be that a trade-off between benefits of  
289 mating with risk-taking males and reproductive benefits of assortative mating (Ariyomo &  
290 Watt, 2013; Both, Dingemanse, Drent & Tinbergen, 2005; Kralj-Fišer, Sanguino Mostajo,  
291 Preik, Pekár & Schneider, 2013; Scherer, Kuhnhardt & Schuett, 2017) explains females' mate  
292 choice. Moreover, risk-taking males tend to be more aggressive (Sih, Bell & Johnson, 2004)  
293 and risk-taking females could be more willing to accept the risk of interacting with aggressive  
294 males than risk-averse females.

295         Our results prompt the question of how exactly females discriminated between risk-  
296 taking and risk-averse males. We carefully matched stimulus males for morphological traits  
297 known to be involved in mate assessment. Nevertheless, females could differentiate between  
298 bold and shy males within the short time (10 min) of our behavioural tests. We may have  
299 overlooked subtle variation of certain (non-behavioural) traits that might correlate with  
300 differences in risk-taking tendencies, such as the intensity of male sexual ornamentation, but  
301 we consider this explanation unlikely. We argue in favour of another explanation: while  
302 females could not assess males' responses to predators (Godin & Dugatkin 1996; Scherer,  
303 Kuhnhardt & Schuett 2017), variation in risk-taking likely correlates with other behavioural  
304 traits that females could evaluate during mate choice, especially males' swimming patterns



305 (Kern, Robinson, Gass, Godwin & Langerhans, 2016; Wilson & Godin, 2009), body posture,  
306 or time to emerge after disturbance (Brown, Jones & Braithwaite, 2005; Sommer-Trembo &  
307 Plath, 2018; this study), as slight disturbances occurred during the mate choice tests through  
308 handling, e.g. when switching stimulus males between the lateral compartments. Tracking  
309 programmes based on deep learning are currently being developed, which will enable us to  
310 analyse movement patterns of fish in unparalleled detail (e.g. Graving et al., 2019). It would  
311 be desirable to conduct a follow-up study using this state-of-the-art technology to investigate  
312 what components of movement patterns characterize different personality types and how  
313 these affect mate choice decisions.

314 Overall then, while mate choice based on directional preferences (Godin & Dugatkin  
315 1996; Kortet, Niemelä, Vainikka & Laakso 2012; Reaney & Backwell) and assortative mate  
316 choice (Ariyomo & Watt, 2013; Both, Dingemans, Drent & Tinbergen, 2005; Kralj-Fišer,  
317 Sanguino Mostajo, Preik, Pekár & Schneider, 2013; Scherer, Kuhnhardt & Schuett, 2017)  
318 seem to be mutually exclusive mechanisms, our results suggest that the existence of a  
319 directional preference does not preclude effects of choosing individuals' personality on  
320 individual variation in mating preferences.

321

322 **Ethics.** The experiments comply with the current laws on animal experimentation of the Federal Republic of  
323 Germany (*Regierungspräsidium Darmstadt* V-54-19c-20/15-F104/Anz.18).

324

325 **Data accessibility.** *The dataset supporting this article has been uploaded as part of the supplementary material.*

326

327 **Authors' contributions.** C.S.-T. and M.S. collected data; C.S.-T. and M.P. conceived the idea for the analysis and  
328 analysed data; C.S.-T. and M.S. wrote the manuscript; all authors gave final approval for publication.

329

330 **Competing interests.** The authors declare no competing interests.

331

332 **Funding.** Funding came from the Deutsche Forschungsgemeinschaft (PL 470/3-1).

333

334 **Acknowledgements.** We would like to thank Bruno Streit and Holger Geupel for their support to this study.

335

## 336 **References**

- 337 Ariyomo, T.O. & Watt, P.J. (2013). Disassortative mating for boldness decreases reproductive success in the guppy. *Behavioral Ecology*,  
338 24(6), 1320-1326. (doi: 10.1093/beheco/art070)
- 339 Ballew, N.G., Mittelbach, G.G. & Scribner, K.T. (2017). Fitness consequences of boldness in juvenile and adult largemouth bass. *American*  
340 *Naturalist*, 189(4), 396-406. (doi: 10.1086/690909)
- 341 Bierbach, D., Oster, S., Jourdan, J., Krause, J., Arias-Rodriguez, L., Wilson, A.D.M. & Plath, M. (2014). Social network analysis resolves  
342 temporal dynamics of male dominance relationships. *Behavioral Ecology and Sociobiology* 68, 935-945. (doi: 10.1007/s00265-  
343 014-1706-y)
- 344 Bisazza, A., Marconato, A. & Marin, G. (1989). Male mate preference in the mosquitofish *Gambusia holbrooki*. *Ethology*, 83(4), 335-343.  
345 (doi: 10.1111/j.1439-0310.1989.tb00541.x)
- 346 Both, C., Dingemanse, N.J., Drent, P.J. & Tinbergen, J.M. (2005). Pairs of extreme avian personalities have highest reproductive success.  
347 *Journal of Animal Ecology*, 74(4), 667-674. (doi: 10.1111/j.1365-2656.2005.00962.x)
- 348 Brooks, R. & Endler, J.A. (2001). Female guppies agree to differ: phenotypic and genetic variation in mate-choice behavior and the  
349 consequences for sexual selection. *Evolution*, 55, 1644-1655. (doi: 10.1111/j.0014-3820.2001.tb00684.x)
- 350 Brown, C., Jones, F. & Braithwaite, V. (2005). In situ examination of boldness-shyness traits in the tropical poeciliid, *Brachyrhaphis episcopi*.  
351 *Animal Behaviour*, 70(5), 1003-1009. (doi:10.1016/j.anbehav.2004.12.002)
- 352 Brown, C., Jones, F. & Braithwaite, V.A. (2007). Correlation between boldness and body mass in natural populations of the poeciliid  
353 *Brachyrhaphis episcopi*. *Journal of Fish Biology*, 71(6), 1590-1601. (doi: 10.1111/j.1095-8649.2007.01627.x)
- 354 Brown, C. & Irving, E. (2013). Individual personality traits influence group exploration in a feral guppy population. *Behavioral Ecology*, 25(1),  
355 95-101. (doi: 10.1093/beheco/art090)
- 356 Coll  ter, M. & Brown, C. (2011). Personality traits predict hierarchy rank in male rainbowfish social groups. *Animal Behaviour*, 81(6), 1231-  
357 1237. (doi: 10.1016/j.anbehav.2011.03.011)
- 358 Cote, J., Dreiss, A. & Clobert, J. (2008). Social personality trait and fitness. *Proceedings of the Royal Society B: Biological Sciences*,  
359 275(1652), 2851-2858. (doi: 10.1098/rspb.2008.0783)
- 360 Cote, J., Fogarty, S., Weinersmith, K., Brodin, T. & Sih, A. (2010). Personality traits and dispersal tendency in the invasive mosquitofish  
361 (*Gambusia affinis*). *Proceedings of the Royal Society B: Biological Sciences*, 277(1687), 1571-1579.
- 362 Dahlbom, S.J., Lagman, D., Lundstedt-Enkel, K., Sundstr  m, F. & Winberg, S. (2011). Boldness predicts social status in zebrafish (*Danio*  
363 *rerio*). *PLOS ONE*, 6, e23565. (doi: 10.1371/journal.pone.0023565)
- 364 Dingemanse, N.J., Both, C., Drent, P.J. & Tinbergen, J.M. (2004). Fitness consequences of avian personalities in a fluctuating  
365 environment. *Proceedings of the Royal Society B: Biological Science*, 271(1541), 847-852. (doi: 10.1098/rspb.2004.2680)
- 366 Dochtermann, N.A., Schwab, T. & Sih, A. (2015). The contribution of additive genetic variation to personality variation: heritability of  
367 personality. *Proceedings of the Royal Society B: Biological Sciences*, 282(1798), 20142201. (doi: 10.1098/rspb.2014.2201)
- 368 Dochtermann, N.A., Schwab, T., Anderson Berdal, M., Dalos, J. & Royaut  , R. (2019). The heritability of behavior: A meta-analysis.  
369 *Journal of Heredity*, 2019, 1-8. (doi: 10.1093/jhered/esz023)
- 370 Edward, D.A. & Chapman, T. (2011). The evolution and significance of male mate choice. *Trends in Ecology and Evolution*, 26(12), 647-  
371 654. (doi: 10.1016/j.tree.2011.07.012)
- 372 Ellis, L. (1995). Dominance and reproductive success among nonhuman animals: A cross-species comparison. *Ethology and Sociobiology*,  
373 16(4), 257-333. (doi: 10.1016/0162-3095(95)00050-U)
- 374 Gasparini, C., Serena, G. & Pilastro, A. (2013). Do unattractive friends make you look better? Context-dependent male mating preferences  
375 in the guppy. *Proceedings of the Royal Society B: Biological Sciences*, 280(1756): 20123072. (doi: 10.1098/rspb.2012.3072)
- 376 Graving, J.M., Chae, D., Naik, H., Li, L., Koger, B., Costelloe, B.R. & Couzin, I.D. (2019). Fast and robust animal pose estimation. *BioRxiv*  
377 (doi: 10.1101/620245)
- 378 Godin, J.G. & Dugatkin, L.A. (1969). Female mating preference for bold males in the guppy, *Poecilia reticulata*. *PNAS*, 93(19), 10262-  
379 10267. (doi: 10.1073/pnas.93.19.10262)
- 380 Gomes-Silva, G., Liu, K., Chen, B., Plath, M. & Sommer-Trembo, C. (2017) Does individual variation in male mate choice copying reflect  
381 differences in social responsiveness? *Annals of Biological Sciences*, 5(1), 25-36.
- 382 Gosling, S.D. (2001). From mice to men: What can we learn about personality from animal research? *Psychological Bulletin*, 127(1), 45-  
383 86.
- 384 Herdman, E.J.E., Kelly, C.D. & Godin, J.-G.J. (2004). Male mate choice in the guppy (*Poecilia reticulata*): do males prefer larger females  
385 as mates? *Ethology*, 110(2), 97-111. (doi: 10.1111/j.1439-0310.2003.00960.x)
- 386 Hoekstra, H.E., Hoekstra, J.M., Berrigan, D., Vignieri, S.N., Hoang, A., Hill, C.E., Beerli, P. & Kingsolver, J.G. (2001). Strength and tempo  
387 of directional selection in the wild. *Proceedings of the National Academy of Sciences USA*, 98(16), 9157-9160. (doi:  
388 10.1073/pnas.161281098)
- 389 Irving, E. & Brown, C. (2013). Examining the link between personality and laterality in a feral guppy *Poecilia reticulata* population. *Journal*  
390 *of Fish Biology*, 83(2), 311-325 (doi: 10.1111/jfb.12165)
- 391 Jacob, A., Evanno, G., Renai, E., Sermier, R. & Wedekind, C. (2009) Male body size and breeding tubercles are both linked to intrasexual  
392 dominance and reproductive success in the minnow. *Animal Behaviour*, 77(4), 823-829. (doi: 10.1016/j.anbehav.2008.12.006)
- 393 Jiang, Y., Bolnick, D.I. & Kirkpatrick, M. (2013) Assortative mating in animals. *American Naturalist*, 181(6), E125-E138. (doi:  
394 10.1086/670160)
- 395 Jordan, R., Kellogg, K., Juanes, F., Howe, D., Staufferals, J., Loew, E. & Losey, G. (2004). Ultraviolet reflectivity in three species of Lake  
396 Malawi rock-dwelling cichlids. *Journal of Fish Biology*, 65(3), 876-882.
- 397 Kern, E.M.A., Robinson, D., Gass, E., Godwin, J. & Langerhans, R.B. (2016). Correlated evolution of personality, morphology and  
398 performance. *Animal Behavior*, 117, 79-86. (doi: 10.1016/j.anbehav.2016.04.007)
- 399 Kodric-Brown, A. (1985). Female preference and sexual selection for male coloration in the guppy (*Poecilia reticulata*). *Behavioral Ecology*  
400 *and Sociobiology*, 17(3), 199-205. (doi: 10.1007/BF00300137)
- 401 Kortet, R., Niemel  , P.T., Vainikka, A. & Laakso, J. (2019). Females prefer bold males; an analysis of boldness, mate choice, and bacterial  
402 resistance in the field cricket *Gryllus integer*. *Ecological Parasitology and Immunology*, 1, 1-16. (doi: 10.4303/epi/235580)
- 403 Kralj-Fi  er, S., Sanguino Mostajo, G.A., Preik, O., Pek  r, S. & Schneider, J.M. (2013) Assortative mating by aggressiveness type in orb  
404 weaving spiders. *Behavioral Ecology*, 24(4), 824-831. (doi: 10.1093/beheco/art030)

- 405 Kralj-Fišer, S. & Schuett, W. (2014). Studying personality variation in invertebrates: why bother? *Animal Behaviour*, 91, 41-52. (doi:  
406 10.1016/j.anbehav.2014.02.016)
- 407 Maan, M.E. & Cummings, M.E. (2009). Sexual dimorphism and directional sexual selection on aposematic signals in a poison frog.  
408 *Proceedings of the National Academy of Sciences*, 106(45), 19072-19077. (doi: 10.1073/pnas.0903327106)
- 409 Marler, C.A. & Ryan, M.J. (1997) Origin and maintenance of a female mating preference. *Evolution*, 51, 1244-1248. (doi: 10.1111/j.1558-  
410 5646.1997.tb03971.x)
- 411 Morris, M., Nicoletto, P.F. & Hesselman, E. (2003) Polymorphism in female preference for a polymorphic male trait in the swordtail  
412 *Xiphophorus cortezi*. *Animal Behaviour*, 65(1):45-52 (doi: 10.1006/anbe.2002.2042)
- 413 Paull, G.C., Filby, A.L., Giddins, H.G., Coe, T.S., Hamilton, P.B. & Tyler, C.R. (2010). Dominance hierarchies in zebrafish (*Danio rerio*) and  
414 their relationship with reproductive success. *Zebrafish*, 7(1), 109-117 (doi: 10.1089/zeb.2009.0618)
- 415 Plath, M., Parzefall, J. & Schlupp, I. (2003). The role of sexual harassment in cave and surface dwelling populations of the Atlantic molly,  
416 *Poecilia mexicana* (Poeciliidae, Teleostei). *Behavioral Ecology and Sociobiology*, 54(3), 303-309. (doi: 10.1007/s00265-003-  
417 0625-0)
- 418 Plath, M., Seggel, U., Burmeister, H., Heubel, K.U. & Schlupp, I. (2006). Choosy males from the underground: male mating preferences in  
419 surface- and cave-dwelling Atlantic mollies (*Poecilia mexicana*). *Naturwissenschaften*, 93(3), 103-109. (doi: 10.1007/s00114-  
420 005-0072-z)
- 421 Reaney, L.T. & Backwell, P.R.Y. (2007). Risk-taking behavior predicts aggression and mating success in a fiddler crab. *Behavioral*  
422 *Ecology*, 18(3), 521-525 (doi: 10.1093/beheco/arm014)
- 423 Rios-Cardenas, O. & Morris, M. (2011). Precopulatory sexual selection. In: Evans, J., Pilastro, A. & Schlupp, I., eds. *Ecology and Evolution*  
424 *of Poeciliid Fishes*, University of Chicago Press, pp. 187-19.
- 425 Scherer, U., Kuhnhardt, M. & Schuett, W. (2017). Different or alike? Female rainbow kribbs choose males of similar consistency and  
426 dissimilar level of boldness. *Animal Behaviour*, 128, 117-1124. (doi: 10.1016/j.anbehav.2017.04.007)
- 427 Schuett, W., Tregenza, T. & Dall, S.R.X. (2010). Sexual selection and animal personality. *Biological Reviews*, 85(2), 217-246. (doi:  
428 10.1111/j.1469-185X.2009.00101.x)
- 429 Sih, A., Bell, A. & Johnson, J.C. (2004). Behavioral syndromes: an ecological and evolutionary overview. *Trends in Ecology and Evolution*,  
430 19(7), 372-378. (doi: 10.1016/j.tree.2004.04.009)
- 431 Smith, B.R. & Blumstein, D.T. (2008). Fitness consequences of personality: a meta-analysis. *Behavioral Ecology*, 19(2), 448-455. (doi:  
432 10.1093/beheco/arm144)
- 433 Sommer-Trembo, C., Bierbach, D., Arias-Rodriguez, L., Verel, Y., Jourdan, J., Zimmer, C., Riesch, R., Streit, B. & Plath, M. (2016a). Does  
434 personality affect premating isolation between locally-adapted populations? *BMC Evolutionary Biology*, 16(1), 138. (doi:  
435 10.1186/s12862-016-0712-2)
- 436 Sommer-Trembo, C., Petry, A.C., Gomes Silva, G., Vurusic, S.M., Gismann, J., Baier, J., Krause, S., de Araujo Cardoso Iorio, J., Riesch,  
437 R. & Plath, M. (2016b). Predation risk and abiotic habitat parameters affect personality traits in extremophile populations of a  
438 neotropical fish (*Poecilia vivipara*). *Ecology and Evolution*, 7(16): 6570-6581 (doi: 10.1002/ece3.3165)
- 439 Sommer-Trembo, C. & Plath, M. (2018). Consistent individual differences in associative learning speed are not linked to boldness in  
440 female Atlantic mollies. *Animal Cognition*, 21(5), 661-670. (doi: 10.1007/s10071-018-1201-3)
- 441 Schweitzer, C., Montreuil, S. & Dechaume-Moncharmont, F.-X. (2015). Coloration reflects behavioural types in the convict cichlid,  
442 *Amatitlania siquia*. *Animal Behaviour*, 105, 201-209. (doi: 10.1016/j.anbehav.2015.04.024)
- 443 Trompf, L. & Brown C. (2014) Personality affects learning and trade-offs between private and social information in guppies, *Poecilia*  
444 *reticulata*. *Animal Behaviour*, 88, 99-106.
- 445 Weiss, A. (2018). Personality traits: A view from the animal kingdom. *Journal of Personality*, 86(1), 12-22. (doi: 10.1111/jopy.12310)
- 446 White, S.J., Kells, T.J. & Wilson, A.J. (2016) Metabolism, personality and pace of life in the Trinidadian guppy, *Poecilia reticulata*.  
447 *Behaviour*, 153(13), 1517-1543.
- 448 Wilson, A.D.M. & Godin, J.-G.J. (2009). Boldness and intermittent locomotion in the bluegill sunfish, *Lepomis macrochirus*. *Behavioral*  
449 *Ecology*, 21(1), 57-62. (doi: 10.1093/beheco/arp157)
- 450 Wolf, M. & Weissing, F.J. (2012). Animal personalities: consequences for ecology and evolution. *Trends in Ecology and Evolution*, 27(8),  
451 452-461. (doi: 10.1016/j.tree.2012.05.001)
- 452
